# Supplementary material
Source: PubMed Central journal article supplement (PMC7116492)

Figure 1a and Extended data Figure 2d

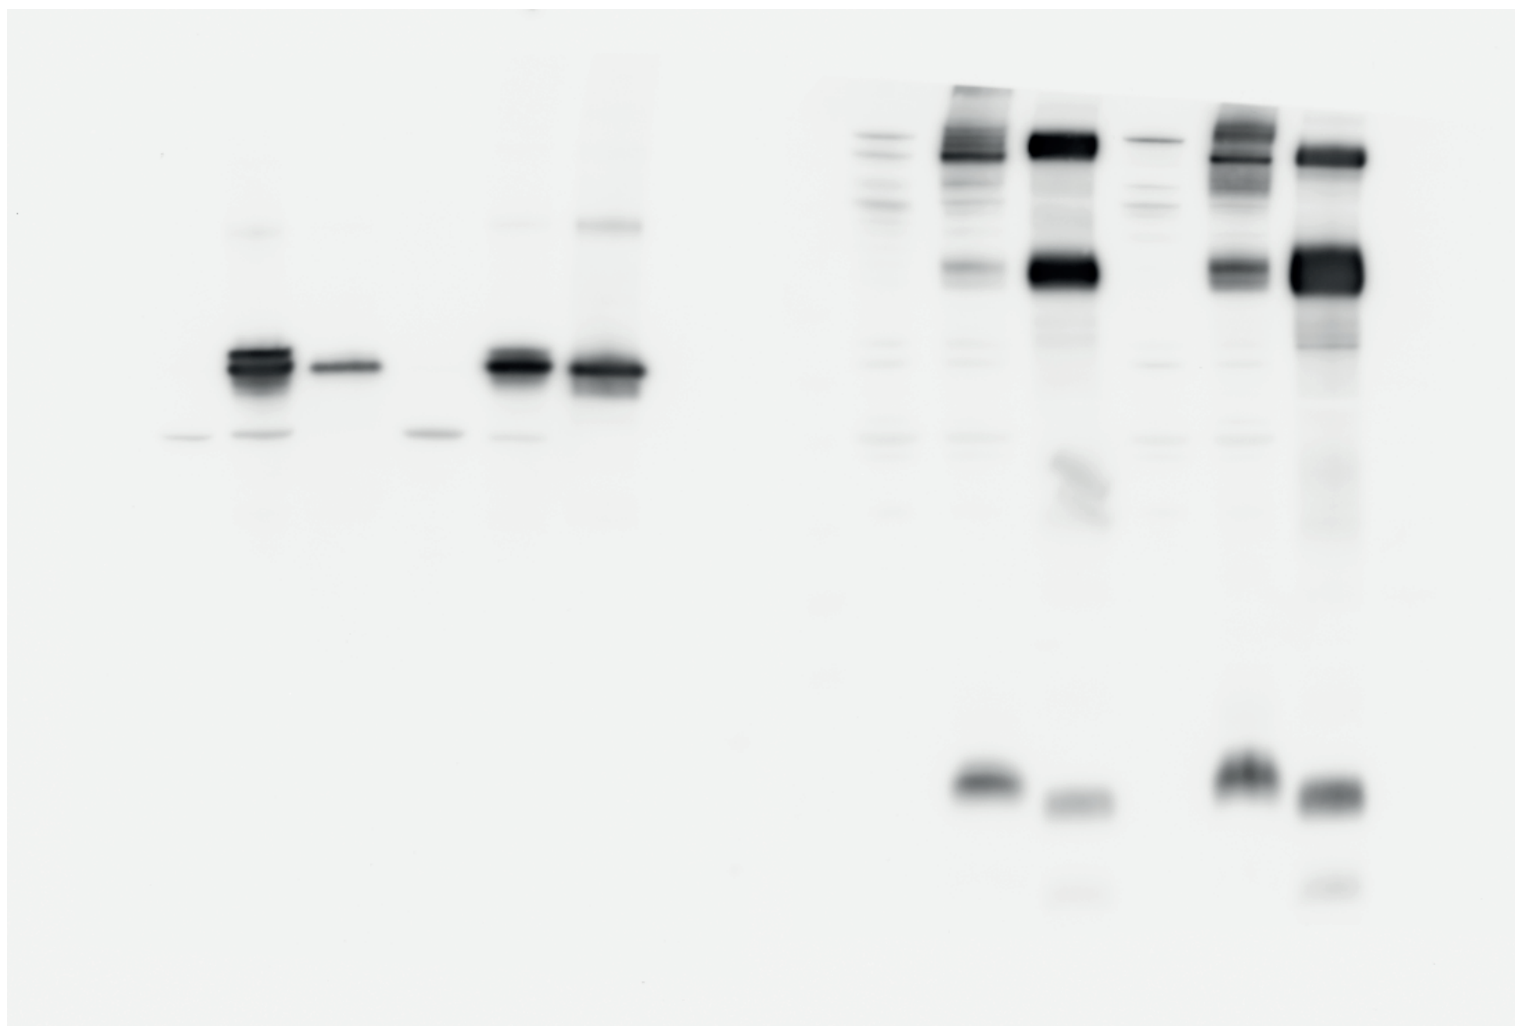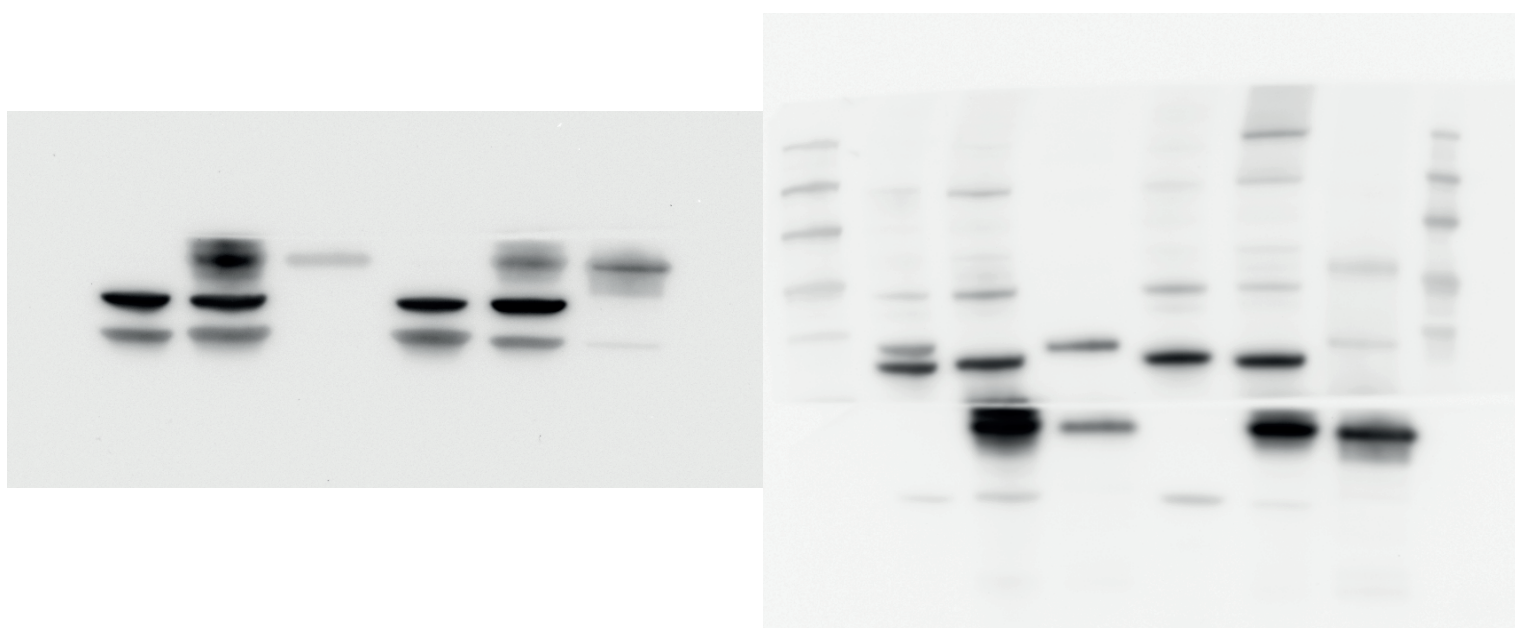

Supplement: EMS103737-supplement-Source_Data.pdf [file EMS103737-supplement-Source_Data.pdf]
